# Supplementary material
Source: PubMed Central journal article supplement (PMC6667793)
Supplement: jiz195_suppl_supplementary_figure_s2.pdf [file jiz195_suppl_supplementary_figure_s2.pdf]

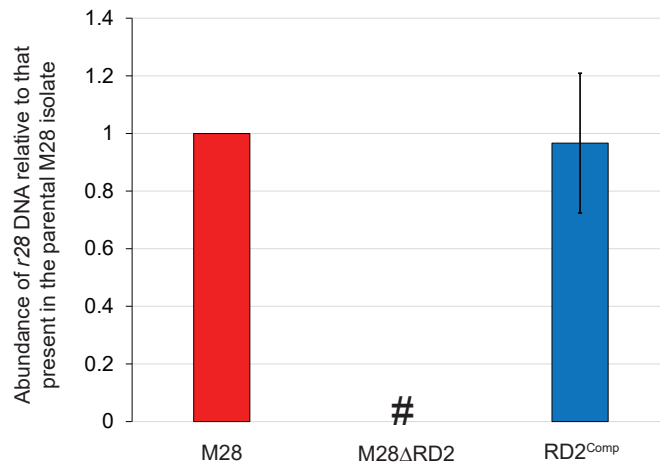

**Figure S2.**

**Verification of similar RD2 copy number in the parental and RD2-complemented strains.**

Quantitative PCR analysis was performed, with taqman primers and probe against the RD2-encoded *r28* gene, using genomic DNA from each of the indicated GAS strains. The hastag (#) is to indicate that no data for *r28* was gained, which is a consequence of this strain lacking RD2 (and hence lacking *r28*). There was no statistically significant difference between the M28 and RD2Comp data (via ANOVA).
