# Supplementary material
Source: PubMed Central journal article supplement (PMC6667793)
Supplement: jiz195_suppl_supplementary_table_1.pdf [file jiz195_suppl_supplementary_table_1.pdf]

| Gene ID     | Comments                                                                | Fold-difference in mRNA abundance for MGAS6180 relative to M28ΔRD2 |
|-------------|-------------------------------------------------------------------------|--------------------------------------------------------------------|
| M28_RS00290 | Bifunctional cyclohydrolase                                             | -11.64                                                             |
| M28_RS00280 | Phosphoribosylformylglycinamide cycloligase                             | -9.84                                                              |
| M28_RS00285 | Phosphoribosylglycinamide formyltransferase                             | -8.82                                                              |
| M28_RS00305 | 5-(carboxyamino)imidazole ribonucleotide mutase                         | -8.04                                                              |
| M28_RS00275 | Amidophosphoribosyltransferase                                          | -7.68                                                              |
| M28_RS00295 | Amidase                                                                 | -7.02                                                              |
| M28_RS00310 | 5-(carboxyamino)imidazole ribonucleotide synthase                       | -6.46                                                              |
| M28_RS00265 | Phosphoribosylaminoimidazolesuccinocarboxamide synthase                 | -6.45                                                              |
| M28_RS06825 | rRNA                                                                    | -6.43                                                              |
| M28_RS00270 | Phosphoribosylformylglycinamide synthase                                | -6.21                                                              |
| M28_RS03370 | Virulence factor S5nA                                                   | -5.77                                                              |
| M28_RS04210 | Guanosine monophosphate reductase                                       | -5.68                                                              |
| M28_RS07230 | Carbonate dehydratase                                                   | -5.33                                                              |
| M28_RS05660 | MFS transporter                                                         | -5.08                                                              |
| M28_RS08590 | PTS cellobiose transporter subunit IIC                                  | -4.68                                                              |
| M28_RS00300 | Phosphoribosylamine--glycine ligase                                     | -4.58                                                              |
| M28_RS07330 | NCS2 family permease                                                    | -4.28                                                              |
| M28_RS02120 | Hypothetical                                                            | -4.17                                                              |
| M28_RS09130 | Hypothetical                                                            | -4.10                                                              |
| M28_RS03950 | Relaxase                                                                | -3.93                                                              |
| M28_RS07955 | tRNA                                                                    | -3.87                                                              |
| M28_RS05265 | Hypothetical                                                            | -3.76                                                              |
| M28_RS07750 | Hypothetical                                                            | -3.63                                                              |
| M28_RS03365 | Peptide deformylase                                                     | -3.62                                                              |
| M28_RS05515 | Virulence factor GRAB                                                   | -3.55                                                              |
| M28_RS09415 | Transposase                                                             | -3.39                                                              |
| M28_RS07130 | Hypothetical                                                            | -3.22                                                              |
| M28_RS07370 | Acetyl-CoA carboxylase carboxyl transferase subunit beta                | -3.15                                                              |
| M28_RS08110 | PTS lactose transporter subunit IIA                                     | -3.05                                                              |
| M28_RS07615 | Fructokinase                                                            | -2.96                                                              |
| araD        | AraD                                                                    | -2.75                                                              |
| M28_RS05355 | Hypothetical                                                            | -2.74                                                              |
| M28_RS06730 | ABC transporter permease                                                | -2.73                                                              |
| M28_RS06420 | Dihydroneopterin aldolase                                               | -2.70                                                              |
| M28_RS05325 | PTS cellobiose transporter subunit IIA                                  | -2.62                                                              |
| M28_RS05165 | Hypothetical                                                            | -2.61                                                              |
| M28_RS08130 | Galactose-6-phosphate isomerase                                         | -2.61                                                              |
| M28_RS08485 | Hypothetical                                                            | -2.60                                                              |
| M28_RS05140 | Hypothetical                                                            | -2.59                                                              |
| M28_RS04815 | Hypothetical                                                            | -2.57                                                              |
| M28_RS06860 | Cysteine synthase A                                                     | -2.52                                                              |
| M28_RS00810 | 3-oxoacid CoA-transferase subunit A                                     | -2.44                                                              |
| M28_RS03740 | Hypothetical                                                            | -2.43                                                              |
| M28_RS02515 | Energy-coupled thiamine transporter ThiT                                | -2.42                                                              |
| M28_RS00320 | Adenylosuccinate lyase                                                  | -2.40                                                              |
| M28_RS07680 | 30S ribosomal protein S18                                               | -2.36                                                              |
| M28_RS03315 | N-acetylmuramidase                                                      | -2.36                                                              |
| M28_RS06740 | 6-phospho-beta-glucosidase                                              | -2.35                                                              |
| M28_RS02615 | PTS N-acetylgalactosamine transporter subunit IIC                       | -2.34                                                              |
| M28_RS08720 | Formate--tetrahydrofolate ligase                                        | -2.34                                                              |
| M28_RS03320 | Pseudogene                                                              | -2.34                                                              |
| M28_RS07365 | Acetyl-CoA carboxylase carboxyl transferase subunit alpha               | -2.32                                                              |
| M28_RS05370 | IS3 family transposase                                                  | -2.32                                                              |
| M28_RS02545 | Phosphoenolpyruvate carboxylase                                         | -2.32                                                              |
| M28_RS07625 | PTS beta-glucoside transporter subunit EIIBC A                          | -2.32                                                              |
| M28_RS00315 | Hypothetical                                                            | -2.31                                                              |
| M28_RS00960 | L-xylulose 5-phosphate 3-epimerase                                      | -2.29                                                              |
| M28_RS08890 | Hypothetical                                                            | -2.24                                                              |
| M28_RS03970 | L-antibiotic streptin                                                   | -2.21                                                              |
| M28_RS07320 | N-acetyltransferase                                                     | -2.20                                                              |
| M28_RS08120 | Tagatose-6-phosphate kinase                                             | -2.19                                                              |
| M28_RS08240 | Phosphoenolpyruvate-dependent sugar PTS family porter, EIIA 2 component | -2.19                                                              |
| M28_RS07620 | Virulence factor EndoS                                                  | -2.17                                                              |
| M28_RS08115 | tagatose-bisphosphate aldolase                                          | -2.15                                                              |
| M28_RS05400 | phosphorylase                                                           | -2.14                                                              |

|             |                                                   |       |
|-------------|---------------------------------------------------|-------|
| M28_RS00415 | 30S ribosomal protein S17                         | -2.14 |
| M28_RS01625 | Membrane protein                                  | -2.13 |
| M28_RS08540 | Hypothetical                                      | -2.12 |
| M28_RS08910 | Hypothetical                                      | -2.11 |
| M28_RS08975 | ArpU family transcriptional regulator             | -2.10 |
| M28_RS06725 | Sugar ABC transporter permease                    | -2.10 |
| M28_RS08935 | Hypothetical                                      | -2.07 |
| M28_RS03870 | PTS mannose transporter subunit IIC               | -2.06 |
| M28_RS07780 | Aquaporin                                         | -2.06 |
| M28_RS09195 | Hypothetical                                      | -2.06 |
| M28_RS04285 | NADH oxidase                                      | -2.05 |
| M28_RS08390 | tRNA                                              | -2.05 |
| M28_RS01720 | Hypothetical                                      | -2.04 |
| M28_RS02620 | PTS N-acetylgalactosamine transporter subunit IIB | -2.04 |
| M28_RS02235 | Multidrug ABC transporter permease                | -2.03 |
| M28_RS08525 | Hypothetical                                      | 2.01  |
| M28_RS04410 | Citrate transporter                               | 2.03  |
| M28_RS04940 | Hypothetical                                      | 2.06  |
| <i>rpsN</i> | RspN                                              | 2.11  |
| M28_RS04465 | Hypothetical                                      | 2.12  |
| M28_RS09035 | 50S ribosomal protein L32                         | 2.13  |
| M28_RS06200 | Hypothetical                                      | 2.14  |
| <i>secE</i> | SecE                                              | 2.16  |
| M28_RS01890 | Exotoxin SpeJ                                     | 2.17  |
| M28_RS06340 | Hypothetical                                      | 2.19  |
| M28_RS08835 | Arsenate reductase                                | 2.22  |
| M28_RS06315 | Hypothetical                                      | 2.23  |
| M28_RS02070 | Bacteriocin                                       | 2.28  |
| M28_RS05425 | Hypothetical                                      | 2.31  |
| M28_RS08140 | Hypothetical                                      | 2.36  |
| M28_RS00235 | tRNA                                              | 2.40  |
| M28_RS04530 | Hypothetical                                      | 2.64  |
| M28_RS08475 | Virulence factor Mrp                              | 2.67  |
| M28_RS06370 | Hypothetical                                      | 2.76  |
| M28_RS08980 | Hypothetical                                      | 2.80  |
| M28_RS00200 | tRNA                                              | 2.81  |
| M28_RS01815 | Hypothetical                                      | 3.28  |
| M28_RS07470 | Hypothetical                                      | 3.41  |
| M28_RS00925 | Hypothetical                                      | 4.09  |
| M28_RS02770 | tRNA                                              | 4.79  |
| M28_RS06495 | tRNA                                              | 6.50  |
| M28_RS02430 | Hypothetical                                      | 7.68  |
| M28_RS08630 | Enamine deaminase RidA                            | 7.97  |

**Table S1**  
**Genes differentially expressed two-fold or greater between strains MGAS6180 and M28ΔRD2.**
