# Supplementary material
Source: PubMed Central journal article supplement (PMC6667793)
Supplement: jiz195_suppl_supplementary_table_2.pdf [file jiz195_suppl_supplementary_table_2.pdf]

| Primer/probe Name | Sequence (5' to 3')                                        | Function                                                                                                                                                            |
|-------------------|------------------------------------------------------------|---------------------------------------------------------------------------------------------------------------------------------------------------------------------|
| RD1               | GAATCTGAGTTTTAACCCAGTCTTC                                  | PCR tiling of RD2 (note that this primer flanks RD2)                                                                                                                |
| RD2               | CAGGTGCTAGACATACTTATGG                                     | PCR tiling of RD2                                                                                                                                                   |
| RD3               | CCCAATATCTACTCCGTT                                         | PCR tiling of RD2                                                                                                                                                   |
| RD4               | GGTCAAGTTTGAATTTGTGAG                                      | PCR tiling of RD2                                                                                                                                                   |
| RD5               | GGATCTGCTACATCATTAGC                                       | PCR tiling of RD2                                                                                                                                                   |
| RD6               | CATGCTAAGGATAATCTTAGTGCCA                                  | PCR tiling of RD2                                                                                                                                                   |
| RD7               | GATTATCGAAAACACCTTGTCTGC                                   | PCR tiling of RD2                                                                                                                                                   |
| RD8               | GGATAAAGAAAGATGCCTCGTCTAC                                  | PCR tiling of RD2                                                                                                                                                   |
| RD9               | CTGATGACTGCATCAGAATCC                                      | PCR tiling of RD2                                                                                                                                                   |
| RD10              | CTGGTTAGTGTAGAACAAGAAGAGG                                  | PCR tiling of RD2                                                                                                                                                   |
| RD11              | CTTGCTTCGGTAAACTTTGAC                                      | PCR tiling of RD2                                                                                                                                                   |
| RD12              | ATCCGATTATCTCAATCTAAGGC                                    | PCR tiling of RD2                                                                                                                                                   |
| RD13              | GAATCAACCAGCGAATAGTACGTTT                                  | PCR tiling of RD2                                                                                                                                                   |
| RD14              | CAGGTGACTTGTGTGGTATTTTC                                    | PCR tiling of RD2                                                                                                                                                   |
| RD15              | CAGAGCGTTTAAATTTGGAAGC                                     | PCR tiling of RD2                                                                                                                                                   |
| RD16              | CAAGGTAGTCTTAAAGGCTTCTC                                    | PCR tiling of RD2                                                                                                                                                   |
| RD17              | TGTATAGATCACTGGTGTGTAGAG                                   | PCR tiling of RD2                                                                                                                                                   |
| RD18              | CTAACCTAACAGCAGATATCAAGC                                   | PCR tiling of RD2                                                                                                                                                   |
| RD19              | GTTTCTTCTGTTCTCACTGCTACAG                                  | PCR tiling of RD2                                                                                                                                                   |
| RD20              | TCATGCTCGCTTGATGAAT                                        | PCR tiling of RD2                                                                                                                                                   |
| RD21              | GACACGACTTTCAAGTAAAG                                       | PCR tiling of RD2                                                                                                                                                   |
| RD22              | AGGGTTGGATATGAGTACAGCAGT                                   | PCR tiling of RD2                                                                                                                                                   |
| RD23              | CTGTACCATCAGAATATCAATACGTG                                 | PCR tiling of RD2                                                                                                                                                   |
| RD24              | CAACTCCATTCTTAAATGTTGCAGC                                  | PCR tiling of RD2                                                                                                                                                   |
| RD25              | GGTGAAAAGTTTAGTGACATTTTAGG                                 | PCR tiling of RD2                                                                                                                                                   |
| RD26              | GCCAGAGGCTAAGCATAGGA                                       | PCR tiling of RD2                                                                                                                                                   |
| RD27              | ATACGTTGAATTTGATGGCAA                                      | PCR tiling of RD2                                                                                                                                                   |
| RD28              | GGTTTCGAGATGCTTTTTAAAGAATC                                 | PCR tiling of RD2                                                                                                                                                   |
| RD29              | CGTAGCAATGCTATTGATCCTTTAC                                  | PCR tiling of RD2                                                                                                                                                   |
| RD30              | ATGTTGCGGGCACCACCTGAATG                                    | PCR tiling of RD2 (note that this primer flanks RD2)                                                                                                                |
| proS.TMF          | TACCACTGGCAATCGTACC                                        | Taqman primer for <i>proS</i>                                                                                                                                       |
| proS.TMR          | CATTTCACAGCACCAGTCT                                        | Taqman primer for <i>proS</i>                                                                                                                                       |
| proS.TMP          | CACGCATGATGGTCTTGAATTTCTCA                                 | Taqman probe for <i>proS</i>                                                                                                                                        |
| endoS.TMF         | CGCAAGGACGAGGACAAAGC                                       | Taqman primer for <i>endoS</i>                                                                                                                                      |
| endoS.TMR         | CCCACCTGCTTAGGTTGCCA                                       | Taqman primer for <i>endoS</i>                                                                                                                                      |
| endoS.TMP         | TGCATACCGTTCGGCACCGTCCAGT                                  | Taqman probe for <i>endoS</i>                                                                                                                                       |
| 1329.TMF          | TCATAGCTGCTTATGATGAAT                                      | Taqman primer for <i>M28.1329</i>                                                                                                                                   |
| 1329.TMR          | TCATAGACCATGAGCCAAATT                                      | Taqman primer for <i>M28.1329</i>                                                                                                                                   |
| 1329.TMP          | AAACATCAATGCCCTATCAACAAGCG                                 | Taqman probe for <i>M28.1329</i>                                                                                                                                    |
| 1330.TMF          | ATTATTCAAACTAGTCAAAAATATTGC                                | Taqman primer for <i>M28.1330</i>                                                                                                                                   |
| 1330.TMR          | TTCGATAAATACTGTAGAAGC                                      | Taqman primer for <i>M28.1330</i>                                                                                                                                   |
| 1330.TMP          | ATTATGCTGGATTCTACTACCTCTCCC                                | Taqman probe for <i>M28.1330</i>                                                                                                                                    |
| R28.TMF           | ATAGTTGAATTTGATGGCAA                                       | Taqman primer for <i>r28</i>                                                                                                                                        |
| R28.TMR           | CCGAGAGCTAAGCATAGGA                                        | Taqman primer for <i>r28</i>                                                                                                                                        |
| R28.TMP           | TGCATCTAATCCGGCTGTTCTCA                                    | Taqman probe for <i>r28</i>                                                                                                                                         |
| UNR391            | CTATTTAAATAACAGATTAAAAAAATATAAcaatcagttggtttatctgttctaaag  | Used with UNR395 to amplify a 1 kb region flanking the <i>r28</i> gene for use in replacing this gene with a spectinomycin resistance cassette (aka strain M28ΔR28) |
| UNR392            | cttagaacaacagataaacaaccatggtttATAATTTTTTAATCTGTTATTAAATAG  | Used with UNR394 to amplify a spectinomycin resistance cassette for use in replacing <i>r28</i> to create strain M28ΔR28                                            |
| UNR393            | CGTTATTAGTTATAGTTATTATAAATCATGTTAcaaacgtttatttagacctcaaac  | Used with UNR397 to amplify a 1 kb region flanking the <i>r28</i> gene for use in replacing this gene with a spectinomycin resistance cassette (aka strain M28ΔR28) |
| UNR394            | gtttagaagcttaaaaataacagttgATACATGTTATAATAAATCAATAAATTAACG  | Used with UNR392 to amplify a spectinomycin resistance cassette for use in replacing <i>r28</i> to create strain M28ΔR28                                            |
| UNR395            | CGCATTTACACTTCTGGATCACTAG                                  | Used with UNR391 to amplify a 1 kb region flanking the <i>r28</i> gene for use in replacing this gene with a spectinomycin resistance cassette (aka strain M28ΔR28) |
| UNR396            | CTGTACCATCAGAAATATCAATACGTG                                | Used with UNR398 to check that <i>r28</i> has been replaced with a spectinomycin resistance cassette in strain M28ΔR28                                              |
| UNR397            | GTTTCGATATCAAGCTCGTCTGGATG                                 | Used with UNR393 to amplify a 1 kb region flanking the <i>r28</i> gene for use in replacing this gene with a spectinomycin resistance cassette (aka strain M28ΔR28) |
| UNR398            | CAACTTGTGAGTATAGATAAAGATAGC                                | Used with UNR396 to check that <i>r28</i> has been replaced with a spectinomycin resistance cassette in strain M28ΔR28                                              |
| UNR400            | gatttgatcacgacagatcagCTAATAGAATTAACATAGTAAAGTATC           | Used with UNR270 to amplify a 1 kb flank of RD2 for use in replacing most of RD2 with a kanamycin resistance cassette (i.e. making strain M28ΔRD2-Kn)               |
| UNR401            | GTAATCGCAATCCGCAATAAAATCACTgctatcttctatactcaacaag          | Used with UNR269 to amplify a 1 kb flank of RD2 for use in replacing most of RD2 with a kanamycin resistance cassette (i.e. making strain M28ΔRD2-Kn)               |
| UNR399            | GATACTACTATGTTAATCTATTAGCagatgctgctgctgataaac              | Used with UNR402 to amplify a kanamycin resistance cassette for use in creating strain M28ΔRD2-Kn                                                                   |
| UNR402            | cttgtagatagaataagatgacAGATTAAATGCGGATGTTGCGATTAC           | Used with UNR399 to amplify a kanamycin resistance cassette for use in creating strain M28ΔRD2-Kn                                                                   |
| UNR211            | ATGTTGCGGGCACCAACCTGAATG                                   | Used with UNR266 to check that most of RD2 has been replaced with a kanamycin resistance cassette in strain M28ΔRD2-Kn                                              |
| UNR269            | CACCTGAAGCTGCTAATCTAATG                                    | Used with UNR401 to amplify a 1 kb flank of RD2 for use in replacing most of RD2 with a kanamycin resistance cassette (i.e. making strain M28ΔRD2-Kn)               |
| UNR270            | CAATTAATAACTTATAGTATTATAAAGAAGG                            | Used with UNR400 to amplify a 1 kb flank of RD2 for use in replacing most of RD2 with a kanamycin resistance cassette (i.e. making strain M28ΔRD2-Kn)               |
| UNR286            | CTTCTCTTCTGAAATCATCTTTACC                                  | Used with UNR211 to check that most of RD2 has been replaced with a kanamycin resistance cassette in strain M28ΔRD2-Kn                                              |
| UNR83             | GATTTTTTATAGATGCGCACCCAGGAATCGAACCTCGGAACGAGCATTACCATTGC   | Used with UNR288 to amplify a 1 kb flank next to RD2 for use in creating strain M28ΔRD2                                                                             |
| UNR84             | CGATTCTCGGTGGTGCATCTATAAAAAATCTGCTCTCAATAAG                | Used with UNR85 to amplify a 1 kb flank next to RD2 for use in creating strain M28ΔRD2                                                                              |
| UNR85             | CTGGGCACGATCTGACACGCGCATGG                                 | Used with UNR84 to amplify a 1 kb flank next to RD2 for use in creating strain M28ΔRD2                                                                              |
| UNR176            | CCATGCGCTGCTCAAGTGTCTGCCAGaaactagagctgaglaaaaittg          | Used with UNR290 to amplify pBBL740 for use in making strain M28ΔRD2                                                                                                |
| UNR288            | CTCTTGTCGCATGTTAATTAACACTGTAGCCTCATTTTGTATGATAAACAAATTAAGG | Used with UNR83 to amplify a 1 kb flank next to RD2 for use in creating strain M28ΔRD2                                                                              |
| UNR290            | CAITTTGAAGAAGATGATGGCTTATTGGgtacgctagcaallgaca             | Used with UNR176 to amplify pBBL740 for use in making strain M28ΔRD2                                                                                                |
| UNR246            | cgttatgattatgattataacatgattGTTGAGCAAAAACTAAAATCTGCTACTC    | Used with UNR250 to amplify a 1 kb flank containing M28_1329 for use in creating strain M28.RD2 <sup>SPEC</sup>                                                     |
| UNR247            | CTATTTAAATAACAGATTAAAAAAATATAAatcatcaattttataagaaactagctag | Used with UNR248 to amplify a 1 kb flank containing M28_1330 for use in creating strain M28.RD2 <sup>SPEC</sup>                                                     |
| UNR248            | GATTTTGAATATGATGGAATG                                      | Used with UNR247 to amplify a 1 kb flank containing M28_1330 for use in creating strain M28.RD2 <sup>SPEC</sup>                                                     |
| UNR249            | CATACCTTTTCAGTACACAAGC                                     | Used with UNR251 to check that a spectinomycin resistance cassette has been inserted between M28_1329/1330 in strain M28.RD2 <sup>SPEC</sup>                        |
| UNR250            | AGTGCATCACTCAATGATGCTCC                                    | Used with UNR246 to amplify a 1 kb flank containing M28_1329 for use in creating strain M28.RD2 <sup>SPEC</sup>                                                     |
| UNR251            | CCTAAATTAACCGTTGGTGG                                       | Used with UNR249 to check that a spectinomycin resistance cassette has been inserted between M28_1329/1330 in strain M28.RD2 <sup>SPEC</sup>                        |
| UNR254            | GAGTAGCAGTTTAGTTTTTGTCTCAACaatacatgtataaactataactaataag    | Used with UNR255 to amplify a spectinomycin resistance cassette for use in creating strain M28.RD2 <sup>SPEC</sup>                                                  |
| UNR255            | ctcctagttttactataaaaattgatcaTTATAATTTTTTAACTGTTATTAAATAG   | Used with UNR254 to amplify a spectinomycin resistance cassette for use in creating strain M28.RD2 <sup>SPEC</sup>                                                  |
| UNR263            | CTGATGACTGCATCAAGATCC                                      | Used with UNR264 to amplify part of the <i>r28</i> gene as a marker for the presence of RD2                                                                         |
| UNR264            | GGATAAAGAAGATGCTCTGCTAC                                    | Used with UNR263 to amplify part of the <i>r28</i> gene as a marker for the presence of RD2                                                                         |
| UNR481            | CAACATATTGACAAATCCCGAATCG                                  | Used with UNR484 to amplify part of the <i>ropB</i> gene for use as a control in the PCR analysis of figure 2A                                                      |
| UNR484            | GGAGTCACTAGAGACTGTG                                        | Used with UNR481 to amplify part of the <i>ropB</i> gene for use as a control in the PCR analysis of figure 2A                                                      |

Table S2  
Primers and probes used in this study.
